# Supplementary material for: AAVolve: Concatenated long-read deep sequencing enables whole capsid tracking during shuffled AAV library selection
Source: PubMed Central journal article supplement — Mol Ther Methods Clin Dev. 2024 Oct 4;32(4):101351. doi: 10.1016/j.omtm.2024.101351 (PMC11532298; doi:10.1016/j.omtm.2024.101351), 2024-10-04
Supplement: mmc1.pdf [file mmc1.pdf]

OMTM, Volume 32

## **Supplemental information**

**AAVolve: Concatenated long-read deep  
sequencing enables whole capsid tracking  
during shuffled AAV library selection**

**Suzanne Scott, Adrian Westhaus, Deborah Nazareth, Marti Cabanes-Creus, Renina Gale Navarro, Deborah Chandra, Erhua Zhu, Aravind Venkateswaran, Ian E. Alexander, Denis C. Bauer, Laurence O.W. Wilson, and Leszek Lisowski**

# Supplemental Material

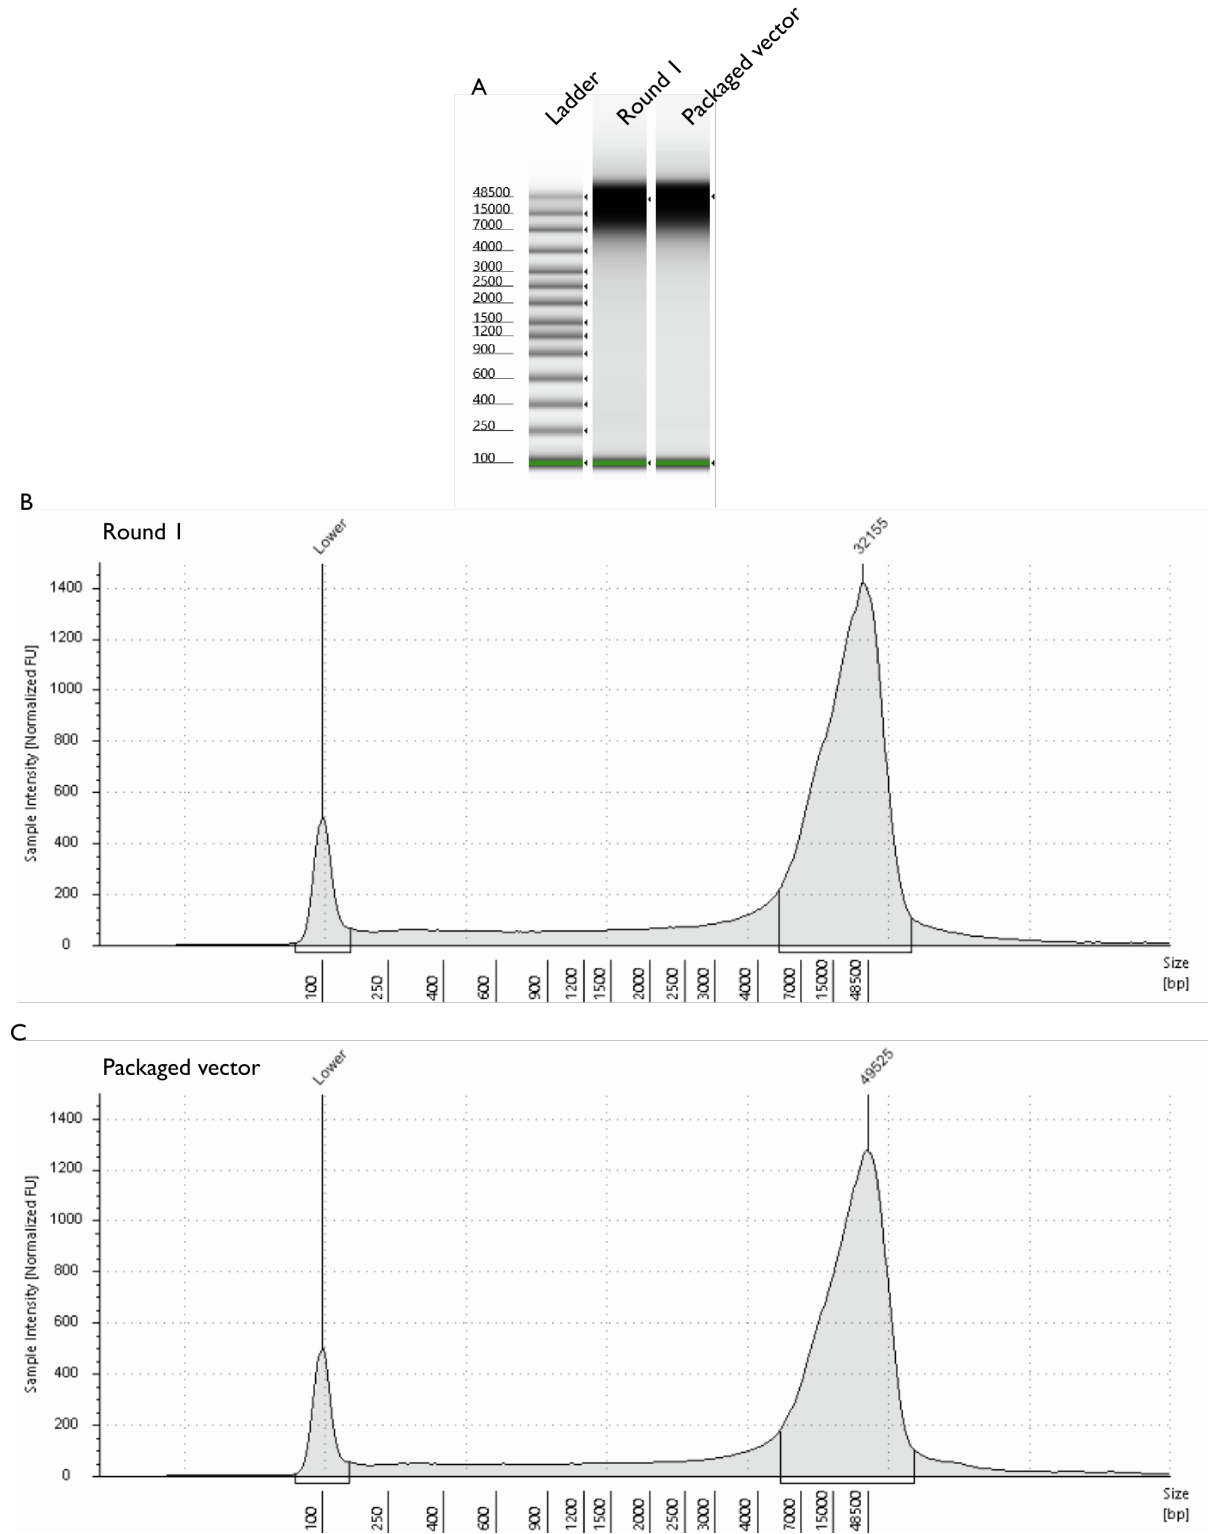

**Figure S1: Concatenated sequence sizes after rolling circle amplification.** Concatenated sequence sizes were assessed by TapeStation using a gDNA TapeScreen (A). A range of fragment sizes were observed, with peaks at 32 kb (B) and 50 kb (C).

**Table S1: Read counts at each stage of processing for nanopore R2C2 sequencing of a shuffled library throughout selection.**

| Selection round | Raw     | Consensus | Filtered consensus | Filtered by reference coverage | Reads with identified parents | Distinct amino acids | Distinct nucleotides |
|-----------------|---------|-----------|--------------------|--------------------------------|-------------------------------|----------------------|----------------------|
| packaged        | 6608269 | 4661647   | 1828943            | 1304081                        | 911631                        | 790877               | 835120               |
| round 1         | 3693976 | 2562420   | 1249968            | 849257                         | 613756                        | 435364               | 508164               |
| round 5         | 2249965 | 1485856   | 431377             | 415711                         | 315647                        | 13069                | 60135                |

**Table S2: Read counts for sequencing technologies used at round 5 of selection (see Table S1 for ONT R2C2)**

| Sequencing technology | Raw     | Consensus | Filtered consensus | Filtered by reference coverage | Reads with identified parents | Distinct amino acids | Distinct nucleotides |
|-----------------------|---------|-----------|--------------------|--------------------------------|-------------------------------|----------------------|----------------------|
| Nanopore              | 5274844 | NA        | NA                 | 2833705                        | 2249                          | 755                  | 2107                 |

|        |        |    |       |       |       |      |      |
|--------|--------|----|-------|-------|-------|------|------|
| Sanger | 48     | NA | NA    | 48    | 44    | 23   | 27   |
| PacBio | 113581 | NA | 67971 | 64926 | 42412 | 2094 | 8749 |
